# Supplementary material
Source: MDPI journal article supplement (https://www.mdpi.com/2072-4292/14/5/1187)
Supplement: s1 [file s1]

The interpolation method is the Inverse Distance Weighting which is commonly used in the hydro-meteorological analysis. Taking the precipitation and temperature as examples, the Nash–Sutcliffe Efficiency coefficients are 0.83 and 0.94, and the Pearson correlation coefficient are 0.91 and 0.97 between the observed and interpolated values by the Cross-Validation.

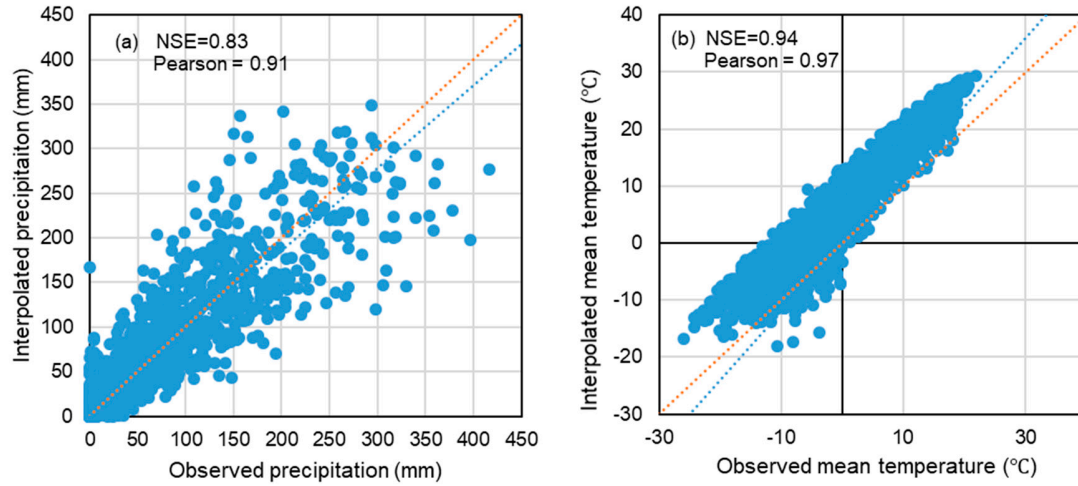

**Figure S1.** Comparison of the observed and interpolated precipitation (a) and mean temperature (b) by cross-validation via Inverse Distance Weighting method.
